# Supplementary material for: The ALS-Related σ1R E102Q Mutant Eludes Ligand Control and Exhibits Anomalous Response to Calcium
Source: Int J Mol Sci. 2020 Oct 4;21(19):7339. doi: 10.3390/ijms21197339 (PMC7582951; doi:10.3390/ijms21197339)
Supplement: Supplementary file 1 [file ijms-21-07339-s001.pdf]

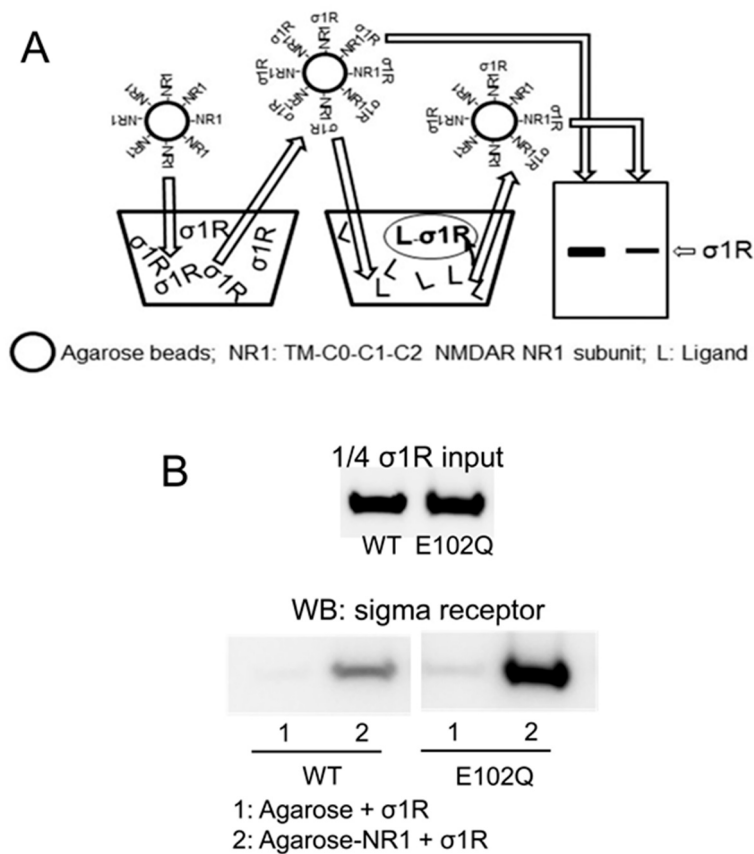

**Figure 1.** In vitro assay of the binding of  $\sigma$ 1R to different signaling proteins. (A) NHS-activated agarose (Sephacrose®) beads were covalently coupled to the N-terminus of the studied protein (NR1 subunit of glutamate NMDA receptor is shown here) and incubated with excess  $\sigma$ 1R (at a concentration determined to induce maximum binding to the agarose-coupled protein by a pilot assay). The unbound  $\sigma$ 1R was washed out, and depending on the type of study, protein-bound  $\sigma$ 1R was analyzed immediately or exposed to serial concentrations of the studied ligands.  $\sigma$ 1R that remained attached to the NR1 subunit was then evaluated by SDS-PAGE and immunoblotting (see the Methods section). (B) Recombinant WT  $\sigma$ 1R and E102Q mutant bound to NHS-activated agarose–C0–C1–C2 region of the NR1 subunit, but not to inactivated NHS-Sephacrose® (negative control). Recombinant cytosolic C0–C1–C2 region of the NMDAR NR1 subunit was covalently attached to NHS-activated Sepharose® and incubated with WT  $\sigma$ 1R or mutant  $\sigma$ 1R (100 nM) in the presence of 2.5 mM  $\text{CaCl}_2$ . NHS, N-Hydroxysuccinimidyl TM, transmembrane; C0–C1–C2, cytosolic region of NR1 subunit of the NMDA receptor; WB, western blot; WT, wild-type.
